# Supplementary material for: Genome-scale study reveals reduced metabolic adaptability in patients with non-alcoholic fatty liver disease
Source: PubMed Central journal article supplement (PMC4742839; doi:10.1038/ncomms9994), 2016-02-03
Supplement: ncomms9994-s1.pdf [file ncomms9994-s1.pdf]

**Supplementary Table 1.** Physical and biochemical characteristics of patients in the transcriptomics study.

|                              | Low Liver Fat      | High Liver Fat       | P-value |
|------------------------------|--------------------|----------------------|---------|
| n (women)                    | 8 (4)              | 8 (5)                | ns      |
| Age (years)                  | 46 ± 3             | 41 ± 4               | ns      |
| PNPLA3 genotype* (CC/CG/GG)  | 5/1/0              | 3/3/1                | ns      |
| <b>Body composition</b>      |                    |                      |         |
| Weight (kg)                  | 153 ± 10           | 146 ± 7              | ns      |
| BMI (kg/m <sup>2</sup> )     | 51.8 ± 2.4         | 49.0 ± 1.1           | ns      |
| <b>Laboratory parameters</b> |                    |                      |         |
| fP-Glucose (mmol/l)          | 5.4 ± 0.4          | 6.9 ± 0.8            | ns      |
| fS-Insulin (mU/l)            | 13 ± 3             | 18 ± 4               | ns      |
| HbA <sub>1c</sub> (%)        | 5.4 ± 1.0          | 5.9 ± 0.3            | ns      |
| S-ALT (U/l)                  | 25 ± 4             | 53 ± 7               | < 0.01  |
| S-AST (U/l)                  | 25 ± 2             | 39 ± 4               | < 0.01  |
| S-γGT (U/l)                  | 28 ± 6             | 40 ± 11              | ns      |
| P-Albumin (g/l)              | 37 ± 2             | 39 ± 3               | ns      |
| fS-Triglycerides (mmol/l)    | 1.8 ± 0.3          | 2.1 ± 0.3            | ns      |
| fS-HDL cholesterol (mmol/l)  | 1.3 ± 0.1          | 1.0 ± 0.1            | < 0.05  |
| fS-LDL cholesterol (mmol/l)  | 2.3 ± 0.3          | 2.4 ± 0.3            | ns      |
| <b>Liver histology</b>       |                    |                      |         |
| Macrovesicular fat (%)       | 2 ± 1 (range 0-10) | 41 ± 7 (range 20-80) | < 0.001 |
| NASH (%)                     | 0%                 | 14%                  | ns      |
| Stage (n, 0/1/2/3/4)         | 7/0/1/0/0          | 6/2/0/0/0            | ns      |

Data shown as mean ± s.e.m.

\*at rs738409. Data are missing from two subjects in the low and one subject in the high liver fat group.

Abbreviations: ALT, alanine aminotransferase; AST, aspartate aminotransferase; fP, fasting plasma; fS, fasting serum; NASH, non-alcoholic steatohepatitis, P, plasma; S, serum.

**Supplementary Table 2.** Clinical characteristics of the study subjects from the metabolomics study.

| All subjects                 |                      |
|------------------------------|----------------------|
| n (women)                    | 9 (1)                |
| Age (years)                  | 54 ± 5               |
| <b>Body composition</b>      |                      |
| Weight (kg)                  | 93 ± 4               |
| BMI (kg/m <sup>2</sup> )     | 29.6 ± 1.1           |
| <b>Laboratory parameters</b> |                      |
| fP-Glucose (mmol/l)          | 7.1 ± 1.0            |
| fS-Insulin (mU/l)            | 20 ± 4               |
| HbA <sub>1c</sub> (%)        | 5.7 ± 0.7            |
| S-ALT (U/l)                  | 92 ± 14              |
| S-AST (U/l)                  | 56 ± 8               |
| S-γGT (U/l)                  | 140 ± 40             |
| P-Albumin (g/l)              | 40 ± 1               |
| fS-Triglycerides (mmol/l)    | 2.7 ± 1.0            |
| fS-HDL cholesterol (mmol/l)  | 1.2 ± 0.1            |
| fS-LDL cholesterol (mmol/l)  | 3.4 ± 0.3            |
| <b>Liver histology</b>       |                      |
| Macrovesicular fat (%)       | 52 ± 26 (range 5-80) |
| NASH (%)                     | 67%                  |
| Stage (n, 0/1/2/3/4)         | 1/3/2/3/0            |

Data are mean ± s.e.m.

Abbreviations: ALT, alanine aminotransferase; AST, aspartate aminotransferase; fP, fasting plasma; fS, fasting serum; NASH, non-alcoholic steatohepatitis; P, plasma; S, serum.

**Supplementary Table 3.** Significantly changing metabolite ratios (hepatic vein vs. artery; two-sided *t*-test) in the basal state or in low-dose insulin infusion based on the measurements, as obtained by metabolomics. Data for all measured bile acids is shown.

| Basal state      |       | Low-dose insulin infusion |       | Metabolite name                       |
|------------------|-------|---------------------------|-------|---------------------------------------|
| <i>P</i> -value  | fold  | <i>P</i> -value           | fold  |                                       |
| <b>0.021</b>     | -1.12 | 0.233                     | -1.05 | Glycine                               |
| <b>0.040</b>     | 1.19  | 0.325                     | 1.30  | 2-Ketovaline                          |
| <b>0.052</b>     | -5.53 | <b>0.004</b>              | -1.98 | Glutamine                             |
| 0.054            | -1.90 | <b>0.017</b>              | -1.21 | Methionine                            |
| 0.055            | -2.03 | <b>0.001</b>              | -3.25 | Alanine                               |
| 0.059            | 1.93  | <b>&lt;0.001</b>          | 2.34  | Glutamic acid                         |
| 0.065            | -1.74 | <b>0.019</b>              | -1.43 | Threonine                             |
| 0.065            | -1.21 | <b>0.014</b>              | -1.29 | L-Proline, hydroxy                    |
| 0.080            | -1.38 | <b>0.003</b>              | -1.21 | Tyrosine                              |
| 0.303            | 1.05  | <b>0.006</b>              | 1.03  | Pyroglutamic acid                     |
| 0.446            | -2.16 | <b>0.012</b>              | -1.55 | l-Threonine                           |
| <b>0.728</b>     | -1.08 | <b>0.005</b>              | 1.41  | Isoleucine                            |
| <b>0.034</b>     | -1.03 | 0.957                     | 1.05  | Butane, 2,3-hydroxy                   |
| 0.465            | 1.10  | <b>0.032</b>              | 1.53  | 3-Oxobutanoic acid                    |
| <b>0.056</b>     | 1.03  | <b>0.038</b>              | 1.19  | $\alpha$ -Hydroxybutyric acid         |
| <b>0.059</b>     | 1.35  | <b>0.041</b>              | 1.23  | $\beta$ -Hydroxybutyric acid          |
| 0.200            | 2.34  | <b>0.028</b>              | -2.08 | Butanoic acid, 2-methyl-3-hydroxy     |
| 0.317            | 1.11  | <b>0.035</b>              | 1.14  | (R*,S*)-3,4-Dihydroxybutanoic acid    |
| 0.933            | 1.09  | <b>0.001</b>              | 1.46  | Alpha-ketoglutaric acid               |
| 0.301            | -1.01 | <b>0.005</b>              | 1.14  | b-Sitosterol                          |
| 0.554            | 1.04  | <b>0.049</b>              | 1.10  | 2-O-Glycerol-à-d-galactopyranoside    |
| 0.836            | 1.09  | <b>0.015</b>              | 2.09  | 1H-Indole-3-acetamide                 |
| <b>0.005</b>     | -1.05 | <b>0.001</b>              | -1.51 | Cyclopentanecarboxylic acid, 1-amino- |
| <b>&lt;0.001</b> | -1.08 | 0.193                     | -1.04 | Linoleic acid                         |
| <b>0.014</b>     | -1.73 | <b>0.014</b>              | -1.72 | Lauric acid                           |

|              |       |                  |       |                                             |
|--------------|-------|------------------|-------|---------------------------------------------|
| <b>0.023</b> | -1.64 | 0.152            | -1.20 | 2-Monopalmitin                              |
| <b>0.025</b> | -2.39 | <b>0.012</b>     | -1.91 | 9-Tetradecenoic acid                        |
| 0.422        | -1.18 | <b>0.017</b>     | -1.54 | Octanoic acid                               |
| 0.436        | -1.11 | <b>0.002</b>     | 1.12  | Propanoic acid, 2,3-hydroxy                 |
| 0.620        | -1.98 | <b>0.019</b>     | -1.89 | 9-Octadecenoic acid, 2-ethyl hydroxyl ester |
| <b>0.048</b> | -1.69 | <b>&lt;0.001</b> | -1.51 | Glycerol                                    |
| <b>0.030</b> | -2.34 | <b>0.027</b>     | -1.45 | 1-Monooleoylglycerol                        |
| <b>0.032</b> | 1.04  | <b>0.011</b>     | 1.08  | Myo-Inositol                                |
| <b>0.033</b> | -1.03 | 0.410            | -1.02 | Arabinofuranose                             |
| 0.115        | -2.00 | <b>0.028</b>     | -3.31 | Arabitol                                    |
| <b>0.030</b> | -1.06 | <b>0.082</b>     | -1.15 | 4-hydroxy-4-phenylbut-1-ene                 |
| <b>0.033</b> | -1.29 | 0.332            | -1.15 | GDCA                                        |
| 0.306        | -1.10 | 0.337            | -1.16 | GCDCA                                       |
| 0.212        | 1.67  | 0.534            | -1.60 | GCA                                         |
| <b>0.048</b> | -1.71 | 0.948            | -1.50 | GUDGA                                       |
| 0.723        | -1.16 | 0.325            | -1.14 | CDCA                                        |
| 0.107        | -1.21 | 0.553            | -1.46 | TCA                                         |
| 0.259        | -1.15 | 0.482            | -1.30 | TDCA                                        |
| 1.000        | -1.14 | 0.308            | 1.00  | GLCA                                        |
| 0.067        | -2.07 | 0.359            | -1.14 | UDCA                                        |
| 0.142        | -1.52 | 0.179            | -1.20 | DCA                                         |

**Supplementary Table 4.** Enriched pathways in the basal state and in low-dose insulin infusion state. 1 and -1 denote metabolic pathways that are enriched with active or inactive reactions, respectively (hyper-geometric  $P$ -value  $<0.01$ ). 0 denotes pathways that are not enriched neither with active nor with inactive reactions.

| Pathway                             | Basal state | Low-dose insulin infusion | Pathway                            | Basal state | Low-dose insulin infusion |
|-------------------------------------|-------------|---------------------------|------------------------------------|-------------|---------------------------|
| Exchange                            | 1           | -1                        | Limonene and pinene degradation    | 0           | -1                        |
| Alanine and Aspartate Metabolism    | 0           | 1                         | Lysine Metabolism                  | 1           | -1                        |
| Aminosugar Metabolism               | -1          | 1                         | Methionine Metabolism              | 1           | 0                         |
| Arginine and Proline Metabolism     | 0           | 1                         | Miscellaneous                      | 1           | 1                         |
| Bile Acid Biosynthesis              | -1          | -1                        | N-Glycan Biosynthesis              | -1          | 1                         |
| Biotin Metabolism                   | -1          | 1                         | N-Glycan Degradation               | -1          | -1                        |
| beta-Alanine metabolism             | 0           | 1                         | Nucleotides                        | 1           | 1                         |
| C5-Branched dibasic acid metabolism | 1           | 0                         | Oxidative Phosphorylation          | 1           | 1                         |
| CYP Metabolism                      | -1          | -1                        | Pentose Phosphate Pathway          | 0           | 1                         |
| Carnitine shuttle                   | -1          | 1                         | Phenylalanine metabolism           | 0           | -1                        |
| Cholesterol Metabolism              | -1          | 1                         | Purine Catabolism                  | -1          | 1                         |
| Citric Acid Cycle                   | 1           | 1                         | Pyrimidine Biosynthesis            | -1          | 1                         |
| CoA Biosynthesis                    | 0           | 1                         | Pyrimidine Catabolism              | -1          | 0                         |
| Cysteine Metabolism                 | 0           | -1                        | Pyruvate Metabolism                | 1           | 1                         |
| Eicosanoid Metabolism               | -1          | -1                        | R Group Synthesis                  | 0           | 1                         |
| Exchange                            | -1          | -1                        | Sphingolipid Metabolism            | -1          | 1                         |
| Fatty acid activation               | 0           | -1                        | Starch and Sucrose Metabolism      | -1          | 0                         |
| Fatty acid elongation               | 0           | 1                         | Taurine and hypotaurine metabolism | 0           | -1                        |
| Fatty acid oxidation                | -1          | 1                         | Tetrahydrobiopterin                | 1           | 0                         |
| Fatty acid oxidation, peroxisome    | -1          | 0                         | Thiamine Metabolism                | 0           | 1                         |
| Folate Metabolism                   | -1          | 1                         | Transport, Endoplasmic Reticular   | 0           | -1                        |

|                                           |    |    |                                   |    |    |
|-------------------------------------------|----|----|-----------------------------------|----|----|
| Fructose and Mannose Metabolism           | -1 | 1  | Transport, Extracellular          | 1  | 0  |
| Galactose metabolism                      | 0  | -1 | Transport, Lysosomal              | -1 | 1  |
| Glutamate metabolism                      | 0  | 1  | Transport, Mitochondrial          | 1  | 1  |
| Glutathione Metabolism                    | 0  | 1  | Transport, Nuclear                | 1  | 1  |
| Glycerophospholipid Metabolism            | -1 | 1  | Transport, Peroxisomal            | -1 | 0  |
| Glycine, Serine, and Threonine Metabolism | 0  | 1  | Triacylglycerol Synthesis         | -1 | 0  |
| Glycolysis/Gluconeogenesis                | 1  | 1  | Tryptophan metabolism             | 0  | 1  |
| Glyoxylate and Dicarboxylate Metabolism   | -1 | 0  | Tyrosine metabolism               | 0  | -1 |
| Heme Biosynthesis                         | -1 | -1 | Urea cycle/amino group metabolism | 0  | 1  |
| Hyaluronan Metabolism                     | 0  | 1  | Vitamin A Metabolism              | 1  | 0  |
| IMP Biosynthesis                          | -1 | 1  | Vitamin B6 Metabolism             | -1 | 0  |
| Inositol Phosphate Metabolism             | -1 | 1  | Vitamin D                         | 0  | -1 |

**Supplementary Table 5.** Significant metabolite concentration changes in the low-dose insulin infusion vs. the basal state (two-sided *t*-test) based on the measurements, as obtained by metabolomics. Data for all measured bile acids is shown.

| Artery          |       | Vein            |       | Name                                                   |
|-----------------|-------|-----------------|-------|--------------------------------------------------------|
| <i>P</i> -value | fold  | <i>P</i> -value | fold  |                                                        |
| <b>0.001</b>    | -1.72 | 0.003           | -1.72 | 4-Methyl-2-oxovaleric acid                             |
| <b>0.001</b>    | 0.00  | 0.139           | 0.00  | Methyl cis-2-trimethylsilyl-cyclopropane-1-carboxylate |
| <b>0.006</b>    | -1.23 | 0.289           | -1.11 | Stearic acid                                           |
| <b>0.006</b>    | -1.31 | 0.549           | 1.12  | 9-Tetradecenoic acid                                   |
| <b>0.006</b>    | -1.39 | <b>0.003</b>    | -1.16 | Methionine                                             |
| <b>0.007</b>    | 3.12  | <b>0.020</b>    | 1.38  | Butanoic acid, 2-methyl-3-hydroxy                      |
| <b>0.008</b>    | 2.86  | 0.297           | -1.62 | Acetic acid, hydroxyl                                  |
| <b>0.008</b>    | -1.14 | 0.061           | -1.04 | Isoleucine                                             |
| <b>0.009</b>    | -1.31 | 0.361           | -1.07 | 4-hydroxy-4-phenylbut-1-ene                            |
| <b>0.010</b>    | -2.62 | 0.684           | -1.34 | 1H-Indole, 2,6-dimethyl-                               |
| <b>0.011</b>    | -1.14 | 0.346           | -1.11 | Valine                                                 |
| <b>0.019</b>    | -1.18 | 0.702           | -1.04 | Linoleic acid                                          |
| <b>0.021</b>    | 1.15  | 0.304           | 1.05  | 1-Dimethyl(isopropyl)silyloxypropane                   |
| <b>0.021</b>    | -1.21 | 0.522           | -1.13 | Hydroxyproline                                         |
| <b>0.022</b>    | -1.28 | 0.737           | 1.08  | Butanoic acid, 2-methyl-3-hydroxy                      |
| <b>0.022</b>    | -1.11 | 0.281           | -1.11 | Palmitic acid                                          |
| <b>0.022</b>    | -1.17 | 0.176           | -1.19 | Oleic acid                                             |
| <b>0.023</b>    | -1.06 | 0.244           | -1.13 | Arachidonic acid                                       |
| <b>0.023</b>    | -1.13 | 0.074           | -1.07 | Leucine                                                |
| <b>0.024</b>    | -2.05 | 0.823           | 1.62  | 1-Methyl-1H-1,2,4-triazole                             |
| <b>0.025</b>    | -2.17 | 0.069           | -2.48 | $\beta$ -Hydroxybutyric acid                           |
| <b>0.027</b>    | -1.32 | <b>0.011</b>    | -1.16 | $\alpha$ -Hydroxybutyric acid                          |
| <b>0.028</b>    | -1.18 | 0.211           | 1.05  | 1,3-Dioxolane                                          |
| <b>0.028</b>    | -1.08 | 0.202           | -1.07 | Xylitol                                                |
| <b>0.029</b>    | 1.43  | 0.855           | 1.02  | Azelaic acid                                           |
| <b>0.031</b>    | -1.12 | 0.377           | -1.19 | Proline, 4-hydroxy-, trans-                            |

|              |       |              |       |                                                                       |
|--------------|-------|--------------|-------|-----------------------------------------------------------------------|
| <b>0.031</b> | -1.02 | 0.768        | -1.00 | 2,2-Dimethyl-1-(2,4,6-trimethylphenyl)propan-1-one                    |
| <b>0.031</b> | 1.27  | 0.285        | 1.13  | Succinic acid                                                         |
| <b>0.035</b> | -3.36 | 0.103        | -2.62 | 3-Oxobutanoic acid                                                    |
| <b>0.038</b> | -1.43 | 0.207        | -1.52 | Gluconic acid, $\gamma$ -lactone, 5-methoximine                       |
| <b>0.039</b> | -1.08 | 0.981        | -1.02 | Threonine                                                             |
| <b>0.041</b> | -1.47 | 0.619        | 1.03  | Galacturonic acid                                                     |
| <b>0.042</b> | 2.82  | <b>0.009</b> | 2.66  | Propanedioic acid, hydroxyl                                           |
| <b>0.047</b> | -1.14 | 0.287        | -1.06 | Proline                                                               |
| <b>0.048</b> | -1.16 | 0.518        | 1.04  | Phenylalanine                                                         |
| <b>0.048</b> | -1.04 | 0.615        | 1.01  | Hexestrol                                                             |
| <b>0.049</b> | 1.04  | 0.904        | -1.00 | 2-Butenedioic acid (Z)-                                               |
| 0.459        | -1.13 | <b>0.005</b> | 2.48  | 1-Iodo-2-methylundecane                                               |
| 0.506        | 1.01  | <b>0.003</b> | 1.21  | b-Sitosterol                                                          |
| 0.577        | 1.05  | <b>0.031</b> | -1.07 | 1,11-dihydroxyundecane                                                |
| 0.762        | -1.02 | <b>0.003</b> | -1.05 | 2,6-Bis(1,1-dimethylethyl)-4-methyl-4-methoxycyclohexa-2,5-dien-1-one |
| 0.852        | 1.01  | <b>0.028</b> | 2.76  | Urea                                                                  |
| 0.862        | -1.10 | <b>0.023</b> | 1.47  | Indole-3-lactic acid                                                  |
| 0.330        | 1.08  | 0.762        | 1.21  | TCA                                                                   |
| 0.488        | 1.16  | 0.242        | 1.10  | TDCA                                                                  |
| 0.967        | 2.67  | 0.634        | 1.00  | UDCA                                                                  |
| 0.157        | -1.33 | 0.269        | -1.17 | CDCA                                                                  |
| 0.763        | 1.29  | 0.932        | 1.32  | DCA                                                                   |
| 0.361        | 2.40  | 0.533        | 2.00  | GCA                                                                   |
| 0.700        | 1.62  | 0.907        | 1.44  | GUDGA                                                                 |
| 0.374        | -1.14 | 0.304        | 1.00  | GLCA                                                                  |
| 0.826        | 1.29  | 0.525        | 2.34  | GDCA                                                                  |
| 0.827        | 1.11  | 0.778        | 1.40  | GCDCA                                                                 |



**Supplementary Table 6.** Metabolite fluxes (or fold changes\*) across the splanchnic bed which significantly correlate with the amount of liver fat based on the measurements (without modelling).

| <b>Metabolite</b>             | <b>Pearson correlation<br/>(liver fat vs. metabolite flux or<br/>fold change*)</b> |
|-------------------------------|------------------------------------------------------------------------------------|
| <i>Basal state</i>            |                                                                                    |
| Glucose                       | -0.966                                                                             |
| Lactic acid                   | -0.962                                                                             |
| L-valine                      | -0.954                                                                             |
| Leucine                       | -0.946                                                                             |
| 2-Ethyl-3-hydroxybutyric acid | -0.946                                                                             |
| Pyruvic acid                  | -0.939                                                                             |
| Alanine                       | -0.876                                                                             |
| Succinic acid                 | -0.872                                                                             |
| <i>Cholesterol</i>            | -0.841                                                                             |
| Azelaic acid                  | -0.774                                                                             |
| Arabifuranose                 | -0.747                                                                             |
| $\beta$ -Sitosterol           | -0.708                                                                             |
| <i>Tricarballic acid</i>      | 0.712                                                                              |
| Methione                      | 0.727                                                                              |
| 1H-Indelo-3-acetic acid       | 0.729                                                                              |
| 3-Hydroxybenzoic acid         | 0.730                                                                              |
| <i>Aminomaloic acid</i>       | 0.735                                                                              |
| l-Tryphtophan                 | 0.765                                                                              |
| <i>Urea</i>                   | 0.778                                                                              |
| Citric acid                   | 0.788                                                                              |
| Phenylalanine                 | 0.791                                                                              |
| Glutamine                     | 0.824                                                                              |
| Creatinine                    | 0.846                                                                              |
| <i>l-Proline, 4-hydroxy</i>   | 0.848                                                                              |
| <i>Altronic acid, lactone</i> | 0.849                                                                              |

|                                  |        |
|----------------------------------|--------|
| Butanedioic acid, methylene      | 0.876  |
| Decanoic acid                    | 0.848  |
| Hexadecanoic acid                | 0.880  |
| 9-Tetradecenoic acid             | 0.883  |
| 2,3,4-Trihydroxybutyric acid     | 0.892  |
| <i>Ethanolamine</i>              | 0.921  |
| <i>Glycerol-3-phosphate</i>      | 0.924  |
| Butanal, 2,3,4-hydroxy           | 0.926  |
| Butane, 2,3-hydroxy              | 0.929  |
| <i>Threonic acid</i>             | 0.940  |
| Aspartic acid                    | 0.950  |
| Eicosanoic acid                  | 0.954  |
| Oleic acid                       | 0.962  |
| <i>Glyceric acid-3-phosphate</i> | 0.971  |
| Docosahexenoic acid              | 0.990  |
| Monopalmitin                     | 0.995  |
| <b><i>Low-dose insulin</i></b>   |        |
| $\alpha$ -Hydroxybutyric acid    | -0.945 |
| Stearic acid                     | -0.859 |
| Ornithine                        | -0.842 |
| 4-Methyl-2-oxovaleric acid       | -0.818 |
| Adipic acid                      | -0.789 |
| <i>Cinnamic acid</i>             | 0.753  |
| Citric acid                      | 0.819  |

\*For metabolites (marked with *cursive*) which were not quantified (*i.e.*, were determined semi-quantitatively), fold changes were used instead of fluxes. For quantified metabolites we found that there is practically no difference in correlation values if fluxes or fold changes are used.

**Supplementary Table 7.** Reactions whose maximal flux rate in the basal state is correlated with liver fat levels, according to the flux-based modelling.

| Reaction                                                          | Subsystem                                 | Spearman<br>(empirical)<br><i>P</i> -value* | Correlation | Maximal flux rate at different fat levels |        |        |        |        |
|-------------------------------------------------------------------|-------------------------------------------|---------------------------------------------|-------------|-------------------------------------------|--------|--------|--------|--------|
|                                                                   |                                           |                                             |             | 5                                         | 30     | 65     | 70     | 70     |
| pyruvate carboxylase                                              | Pyruvate Metabolism                       | 0.033 (8.26E-03)                            | 0.975       | 0                                         | 86.4   | 524.98 | 814.97 | 1000   |
| dimethylglycine dehydrogenase, mitochondrial                      | Glycine, Serine, and Threonine Metabolism | 0.033 (8.26E-03)                            | 0.975       | 25                                        | 50     | 63.76  | 84.28  | 191.83 |
| Sarcosine dehydrogenase (m)                                       | Urea cycle/amino group metabolism         | 0.033 (8.26E-03)                            | 0.975       | 25                                        | 50     | 100.43 | 168.56 | 507.72 |
| guanylate kinase (GMP:ATP)                                        | Nucleotides                               | 0.033 (8.26E-03)                            | 0.975       | 0                                         | 57.35  | 97.62  | 143.72 | 1000   |
| 5'-nucleotidase (GMP)                                             | Nucleotides                               | 0.033 (8.26E-03)                            | 0.975       | 0                                         | 7.35   | 97.62  | 156.69 | 1000   |
| pyruvate mitochondrial transport via proton symport               | Transport, Mitochondrial                  | 0.033 (8.26E-03)                            | 0.975       | -201.61                                   | -79.61 | 517.9  | 648.04 | 1000   |
| 1-acylglycerol-3-phosphate O-acyltransferase 1                    | Triacylglycerol Synthesis                 | 0.033 (8.26E-03)                            | 0.975       | 21.77                                     | 83.99  | 342.06 | 613.06 | 443.46 |
| Deoxyadenosine deaminase                                          | Nucleotides                               | 0.033 (8.26E-03)                            | 0.975       | 101.92                                    | 126.79 | 150    | 252.64 | 1000   |
| glucose 6-phosphate endoplasmic reticular transport via diffusion | Transport, Endoplasmic Reticular          | 0.033 (8.26E-03)                            | 0.975       | 0                                         | 49.45  | 50.99  | 210.4  | 1000   |
| L-proline reversible transport via proton symport                 | Transport, Extracellular                  | 0.033 (8.26E-03)                            | 1.000       | 863.6                                     | 982.77 | 998.46 | 1000   | 1000   |

|                                                                   |                                            |                  |       |        |        |        |        |        |
|-------------------------------------------------------------------|--------------------------------------------|------------------|-------|--------|--------|--------|--------|--------|
| formaldehyde transport via diffusion (mitochondrial)              | Transport, Mitochondrial                   | 0.033 (8.26E-03) | 0.975 | 25     | 50     | 63.76  | 84.28  | 191.83 |
| 5'-nucleotidase (dGMP)                                            | Nucleotides                                | 0.033 (8.26E-03) | 0.975 | 50     | 61.44  | 150.02 | 158.99 | 1000   |
| CO2 transport (diffusion), mitochondrial                          | Transport, Mitochondrial                   | 0.033 (8.26E-03) | 0.975 | 149.82 | 249.81 | 568.21 | 925.3  | 1000   |
| Inosine transport (diffusion)                                     | Transport, Extracellular                   | 0.033 (8.26E-03) | 0.975 | 51.92  | 76.79  | 100    | 202.64 | 1000   |
| purine-nucleoside phosphorylase (Deoxyinosine)                    | Purine Catabolism                          | 0.033 (8.26E-03) | 0.975 | 51.92  | 76.79  | 100    | 202.64 | 1000   |
| methenyltetrahydrofolate cyclohydrolase, mitochondrial            | Folate Metabolism                          | 0.033 (8.26E-03) | 0.975 | 25     | 50     | 100.43 | 168.56 | 666.78 |
| Proline transport (sodium symport) (2:1)                          | Transport, Extracellular                   | 0.033 (8.26E-03) | 1.000 | 863.6  | 982.77 | 998.46 | 1000   | 1000   |
| betaine-homocysteine S-methyltransferase                          | Glycine, Serine, and Threonine Metabolism  | 0.033 (8.26E-03) | 0.975 | 25     | 50     | 63.76  | 84.28  | 191.83 |
| H2O endoplasmic reticulum transport                               | Transport, Endoplasmic Reticular           | 0.033 (8.26E-03) | 0.975 | 535.8  | 559.34 | 600.5  | 846.6  | 1000   |
| 3-oxoacid CoA-transferase                                         | Valine, Leucine, and Isoleucine Metabolism | 0.033 (8.26E-03) | 0.975 | 0      | 98.48  | 137.83 | 373.71 | 1000   |
| Citrate exchange                                                  |                                            | 0.033 (8.26E-03) | 1.000 | 466.51 | 638.71 | 832.58 | 1000   | 1000   |
| retinol acyltransferase                                           | Vitamin A Metabolism                       | 0.033 (8.26E-03) | 0.975 | 0      | 50     | 301.15 | 1000   | 551.86 |
| R total flux                                                      | R Group Synthesis                          | 0.033 (8.26E-03) | 0.975 | 0      | 50     | 50.41  | 106.25 | 384.81 |
| dimethylglycine transport via diffusion (cytosol to mitochondria) | Transport, Mitochondrial                   | 0.033 (8.26E-03) | 0.975 | 25     | 50     | 63.76  | 84.28  | 191.83 |

|                                                         |                                |                  |       |         |        |        |        |        |
|---------------------------------------------------------|--------------------------------|------------------|-------|---------|--------|--------|--------|--------|
| phosphoglycerate mutase                                 | Glycolysis/Gluconeogenesis     | 0.033 (8.26E-03) | 0.975 | -102.73 | 0      | 695.05 | 995.07 | 1000   |
| monoacylglycerol acyltransferase                        | Triacylglycerol Synthesis      | 0.033 (8.26E-03) | 0.975 | 0       | 52.71  | 299.16 | 1000   | 555.29 |
| formaldehyde dehydrogenase                              | Tyrosine metabolism            | 0.033 (8.26E-03) | 0.975 | -2.32   | 100    | 113.76 | 134.28 | 288.96 |
| glutamine-fructose-6-phosphate transaminase             | Aminosugar Metabolism          | 0.033 (8.26E-03) | 0.975 | 0       | 38.23  | 210.9  | 222.97 | 1000   |
| glycerol kinase                                         | Glycerophospholipid Metabolism | 0.033 (8.26E-03) | 0.975 | 0       | 29.87  | 198.25 | 607.39 | 295.91 |
| deoxyinosine transport via diffusion                    | Transport, Extracellular       | 0.033 (8.26E-03) | 0.975 | 51.92   | 76.79  | 100    | 202.64 | 1000   |
| Deoxyinosine exchange                                   |                                | 0.033 (8.26E-03) | 0.975 | 338.05  | 527.74 | 728.4  | 891.31 | 1000   |
| Deoxyadenosine deaminase, extracellular                 | Nucleotides                    | 0.033 (8.26E-03) | 0.975 | 101.92  | 126.79 | 150    | 252.64 | 1000   |
| L-carnitine transport out of mitochondria via diffusion | Transport, Mitochondrial       | 0.033 (8.26E-03) | 0.975 | 0       | 2.95   | 7.9    | 262.41 | 1000   |
| formate-tetrahydrofolate ligase                         | Folate Metabolism              | 0.033 (8.26E-03) | 1.000 | -52.32  | 137.11 | 776.91 | 1000   | 1000   |
| Adenosine deaminase, extracellular                      | Nucleotides                    | 0.033 (8.26E-03) | 0.975 | 101.92  | 126.79 | 150    | 252.64 | 1000   |
| S-Formylglutathione hydralase                           | Tyrosine metabolism            | 0.033 (8.26E-03) | 0.975 | -2.32   | 100    | 113.76 | 134.28 | 288.96 |
| Adenosine deaminase                                     | Purine Catabolism              | 0.033 (8.26E-03) | 0.975 | 101.92  | 126.79 | 150    | 252.64 | 1000   |
| glycerol-3-phosphate acyltransferase                    | Triacylglycerol Synthesis      | 0.033 (8.26E-03) | 0.975 | 21.77   | 83.99  | 342.06 | 613.06 | 443.46 |
| glucose-6-phosphate phosphatase, edoplasmic             | Glycolysis/Gluconeogenesis     | 0.033 (8.26E-03) | 0.975 | 0       | 49.45  | 50.99  | 210.4  | 1000   |

|           |  |  |  |  |  |  |  |  |
|-----------|--|--|--|--|--|--|--|--|
| reticular |  |  |  |  |  |  |  |  |
|-----------|--|--|--|--|--|--|--|--|

\*Corrected for multiple hypothesis *via* FDR, with false discovery rate limited to 0.1.
